## **Enrichment of the HIV reservoir in CD32+ CD4 T cells occurs early in blood and tissue**

Genevieve E Martin<sup>1\*</sup>, Matthew Pace<sup>1\*</sup>, John P Thornhill<sup>1,2\*</sup>, Chansavath Phetsouphanh<sup>1</sup>, Jodi Meyerowitz<sup>1</sup>, Morgane Gossez<sup>1</sup>, Emily Hopkins<sup>1</sup>, Helen Brown<sup>1</sup>, Nicola Robinson<sup>1</sup>, Natalia Olejniczak<sup>1</sup>, Gita Ramjee<sup>3</sup>, Pontiano Kaleebu<sup>4</sup>, Kholoud Porter<sup>5</sup>, Christian Willberg<sup>1,6</sup>, Paul Klenerman<sup>1,6</sup>, Nneka Nwokolo<sup>7†</sup>, Julie Fox<sup>8†</sup>, Sarah Fidler<sup>2†</sup>, John Frater<sup>1,6,9†</sup> on behalf of the CHERUB investigators

<sup>1</sup> Peter Medawar Building for Pathogen Research, Nuffield Department of Medicine, University of Oxford, Oxford, UK

<sup>2</sup> Division of Medicine, Wright Fleming Institute, Imperial College, London, UK

<sup>3</sup> HIV Prevention Research Unit, South African Medical Research Council, Durban, South Africa

<sup>4</sup> Medical Research Council/Uganda Virus Research Institute, Entebbe, Uganda

<sup>5</sup> Research Department of Infection and Population Health, University College London, London, UK

<sup>6</sup> National Institute of Health Research Biomedical Research Centre, Oxford, UK

<sup>7</sup> Chelsea and Westminster Hospital, London, UK

<sup>8</sup> Department of Genitourinary Medicine and Infectious Disease, Guys and St Thomas' NHS Trust, London, UK

<sup>9</sup> Oxford Martin School, Oxford, UK

\*, † these authors contributed equally

### **Corresponding authors:**

John Frater and Genevieve Martin, Nuffield Department of Medicine, Peter Medawar Building for Pathogen Research, John Radcliffe Hospital, Oxford, UK. Email: [john.frater@ndm.ox.ac.uk](mailto:john.frater@ndm.ox.ac.uk); [genevieve.martin@ndm.ox.ac.uk](mailto:genevieve.martin@ndm.ox.ac.uk)

1 **Abstract**

2 The Fc receptor CD32 has been proposed as a marker for CD4 T cells  
3 latently infected with HIV. We demonstrate that enrichment for HIV DNA in  
4 CD32+ CD4 T cells can be found early in infection in both tissue and blood.  
5 However, we find no evidence for a correlation between CD32 expression on  
6 CD4 T cells and either HIV DNA levels or time to rebound viraemia following  
7 treatment interruption. CD32+ CD4 T cells have a more differentiated memory  
8 phenotype, and high levels of expression of immune checkpoint receptors PD-  
9 1, Tim-3 and TIGIT as well as the activation marker, HLA DR. There was no  
10 difference in the phenotype or frequency of CD32 expressing cells prior to or  
11 after the initiation of antiretroviral therapy, or compared with healthy controls,  
12 suggesting that preferential infection or survival, rather than up-regulation,  
13 may be responsible for the observed enrichment of proviral HIV DNA in  
14 CD32+ CD4 T cells.

15

## 16 Introduction

17 A cure for HIV infection is contingent on targeting and neutralising a reservoir  
18 of latently infected cells that persist despite effective antiretroviral therapy.  
19 These cells are predominantly resting memory CD4+ T cells and contain  
20 transcriptionally-silent integrated proviral HIV DNA. Activation of these cells  
21 results in HIV production and disease progression in the absence of ART.  
22 Latently infected cells are extremely rare (0.0001 - 0.1% of CD4 T cells),  
23 complicating their study. Accordingly, there has been a research effort to  
24 identify cell surface markers which identify latently infected cells to facilitate  
25 their characterisation and targeting. For example, immune checkpoint  
26 receptors (ICRs)<sup>1</sup> such as Programmed Death Receptor-1 (PD-1), T cell  
27 immunoglobulin and mucin domain-containing molecule (Tim)-3 and T cell  
28 immunoreceptor with immunoglobulin and ITIM domains (TIGIT) are  
29 associated with an exhausted effector state<sup>2-5</sup> and their expression correlates  
30 with HIV disease progression and viral rebound following treatment  
31 interruption<sup>4,6,7</sup>. ICRs have been reported to be highly expressed on cells  
32 comprising the HIV reservoir<sup>8,9</sup>, but are not discriminatory. Equally, CD2 was  
33 reported to be enriched on latently infected cells, but is also widely expressed  
34 on other T cells<sup>10</sup>.

35

36 Recently, CD32a (FcγRIIa) - a low affinity IgG receptor expressed on myeloid  
37 cells and granulocytes, but not generally considered to be expressed on T  
38 cells<sup>11</sup> – has been proposed as a specific surface marker for latent HIV  
39 infection<sup>12</sup>. It is unclear whether this enrichment holds true in tissue<sup>13</sup> as well

40 as peripheral blood CD4 T cells, or whether there is differential expression in  
41 resting memory cells which comprise a major part of the latent reservoir<sup>9,14,15</sup>.  
42 Here we investigate CD32 expression on CD3+ CD4+ cells in the blood and  
43 tissue of individuals treated during primary HIV infection (PHI) (a group of  
44 interest due to an association with post treatment virological remission and a  
45 more labile reservoir<sup>16-18</sup>), and explore associations with cell phenotype, other  
46 putative reservoir markers and clinical progression.

47

## 48 **Results**

### 49 *Participants*

50 We studied individuals who commenced antiretroviral therapy (ART) during  
51 primary HIV infection (PHI) from two clinical trials (SPARTAC<sup>19</sup> and  
52 HEATHER<sup>7</sup>). Key demographic and clinical characteristics are shown in Table  
53 1. The median time from estimated seroconversion to ART initiation was 74  
54 days (interquartile range, IQR 36 – 114 days). Median baseline plasma viral  
55 load (pVL) was 4.94 log<sub>10</sub>[copies/ml] (IQR 4.09 – 6.52) and CD4 T cell count  
56 was 545 cells/ $\mu$ l (IQR 453 - 696). Clinical, immunological and reservoir  
57 measures presented are at baseline (before the initiation of ART) and after 1  
58 year of ART (median 48.1 weeks; IQR 47.9 to 52.9 weeks). Healthy controls  
59 (n=10; 100% male; median age 34.5 [IQR 30.5-42.5] years) were included for  
60 comparison.

61

62 *CD32+ CD4 T cells are enriched for HIV DNA*

63 For participants on ART, the median percentage of CD4 T cells expressing  
64 CD32 was 1.5% (range 0.24–6.4%; representative gating shown in Fig. 1a;  
65 further examples in Supplementary Fig. 1). This did not differ from pre-therapy  
66 levels (median 1.4%; range 0.31-2.6%) or healthy controls (median 1.7%;  
67 range 0.49-4.9%; Fig. 1b;  $p=0.55$ ). In treated individuals ( $n=6$ , Supplementary  
68 Table 1), sorted CD32+ CD4 T cells were highly enriched for HIV DNA  
69 compared with CD32- cells (median 69-fold enrichment; range 16-333 fold;  
70 Fig 1c), providing the first confirmation of CD32 as a marker of an enriched  
71 reservoir. The percentage of CD32+ CD4 T cells, however, did not correlate  
72 with reservoir size as measured by HIV DNA in CD4 T cells either on ART  
73 (Fig. 1d) or prior to ART initiation (Supplementary Fig. 2). The fold enrichment  
74 varied significantly between individuals, which may partially explain the  
75 observed absence of correlation.

76 Whether percentage of CD32+ CD4 T cells predicted time to pVL rebound  
77 after ART treatment interruption (TI) was assessed in a subset of individuals  
78 after 48 weeks of suppressive ART ( $n=19$ ). In Cox models, we found no  
79 evidence to support such an association for CD32 expression (HR 1.2 (95%  
80 CI 0.85 – 1.8),  $p=0.29$ ). There was, however, weak evidence of an association  
81 between time to rebound and baseline pVL ( $p=0.053$ ), but not with baseline  
82 CD4 T cell count or HIV DNA at TI, parameters which had been associated  
83 with time to rebound in a large sub-analysis of the SPARTAC<sup>20</sup>  
84 (Supplementary Table 2). Three individuals remained virologically suppressed  
85 at the end of follow up after TI (median 197 weeks), all of whom had CD32+  
86 CD4% values below the median (Fig. 1e).

87

88 *CD32 expression on CD4 T cells is associated with a differentiated memory*  
89 *phenotype*

90 As CD4 T cells have not previously been considered to express CD32, little is  
91 known about which CD4 T cells express this marker. We therefore compared  
92 the memory phenotype of CD32+ and CD32- CD4 T cell subsets (as defined  
93 in Fig. 2a) during treated PHI. CD32+ CD4 T cells had lower proportions of  
94 naïve and central memory ( $T_{CM}$ ) T cells than their CD32- counterparts. In  
95 contrast, transitional memory ( $T_{TM}$ ), effector memory ( $T_{EM}$ ) and  $T_{EMRA}$  cells  
96 comprised a greater portion of the CD32+ CD4 T cell pool than for CD32-  
97 CD4 T cells (Fig. 2b; all  $p < 0.001$ ), reflecting a more differentiated memory  
98 phenotype. The same pattern was also observed in healthy controls (Fig. 2c)  
99 and prior to ART initiation (Supplementary Fig. 3).

100

101 *CD32 expressing CD4 T cells have high levels of immune checkpoint*  
102 *receptors*

103 The expression of PD-1, Tim-3 and TIGIT was elevated on CD32+ CD4 T  
104 cells compared with CD32- counterparts, in both treated HIV+ individuals and  
105 healthy controls (Figure 3a-d), although without significant correlations  
106 between ICR and CD32 expression (Supplementary Fig. 4). Elevated  
107 expression of all three ICRs on CD32+ CD4 T cells was also observed at  
108 baseline (Supplementary Fig. 5) and, for PD-1 and Tim-3, at higher levels  
109 than after a year of ART. These ICRs are known to be variably expressed on

110 different CD4 memory subsets, with elevated expression on non-naïve T  
111 cells<sup>8,9,21</sup>. Elevated PD-1, Tim-3 and TIGIT expression was observed even  
112 when accounting for memory differentiation (Supplementary Fig 6), excluding  
113 this as a confounder for the observed elevated ICR expression.

114 CD2 is ubiquitously expressed on CD4 T cells, but higher density of CD2  
115 expression has been associated with enriched HIV DNA<sup>10</sup>. CD2 density  
116 (measured by median fluorescence intensity) was elevated on CD32+  
117 compared to CD32- CD4 T cells (Figure 3e), consistent with these results.

118

119 *CD32+ CD4 T cells are activated and express high levels of HIV co-receptors*

120 Amongst treated HIV-infected individuals (n=8, Supplementary Table 1)  
121 CD32+ CD4 T cells expressed markedly elevated levels of the activation  
122 marker HLA-DR (Figure 3f). In healthy controls, the expression of CCR5 and  
123 CXCR4, the co-receptors used by HIV for cellular entry, was increased on  
124 CD32+ CD4 T cells (Figure 3g,h).

125

126 *CD32+ CD4 T cells in gut and tonsil*

127 CD32 expression on CD4 T cells in tonsil (HIV+ n=1), and terminal ileal and  
128 rectal biopsies (HIV+ n=1, control n=3) was at similar levels as in the  
129 periphery and did not appear to differ between HIV-infected and uninfected  
130 participants (Figure 4a). Sorted CD32+ CD4 T cells from tonsillar tissue were  
131 >4-fold enriched for HIV DNA relative to CD32- cells, and total CD4 T cells

132 (0.025 vs 0.0061 and 0.0051 copies/cell respectively). Of note, this individual  
133 had commenced ART but was not virologically suppressed at the time of  
134 tonsillectomy (plasma VL 267 copies/ml). As in the periphery, CD32+ CD4 T  
135 cells from tissue were consistently more activated (as measured by HLA-DR  
136 expression) than CD32- cells (Figure 4b). Gut and tonsil CD32+ CD4 T cells  
137 showed a similar elevated pattern of ICR expression as in the periphery  
138 (Figure 4c), although there was considerable variation between biopsy sites.

139

## 140 **Discussion**

141 The report of CD32 as a marker of an enriched T cell HIV reservoir is  
142 potentially a key milestone in the search for a cure for HIV infection. To  
143 explore this finding further, we analysed individuals treated with ART early  
144 during PHI. We confirm that CD32+ CD4 T cells in peripheral blood are  
145 enriched for HIV DNA and provide the first data from tissue to support this  
146 association. We show that CD32+ CD4 T cells have a more differentiated  
147 memory phenotype, and express high levels of PD-1, Tim-3 and TIGIT, as  
148 well as the activation marker HLA-DR. Importantly, we show that the  
149 frequency and phenotype of CD32+ CD4 T cells is similar between uninfected  
150 and infected individuals - both prior to and following the initiation of ART. Our  
151 characterisation of CD32+ cells in tonsil and gut provides further insight into  
152 the relevance of these cells to the overall HIV reservoir *in vivo*.

153 Although the original association of CD32 expression with the HIV reservoir  
154 was unexpected, our findings are consistent with current understanding of the  
155 distribution of the HIV reservoir. We show that CD32+ CD4 T cells have a



156 more differentiated memory phenotype, consistent with the fact that memory T  
157 cells comprise a large part of the HIV reservoir. It is interesting that central  
158 memory cells - the memory subset with the highest level of proviral DNA<sup>9,14</sup> -  
159 were less frequent amongst CD32 expressing cells. The expression of PD-1  
160 and TIGIT has been reported to mark an enriched reservoir, although the fold  
161 enrichment in HIV DNA observed for these markers is substantially lower than  
162 that observed by us and others for CD32<sup>8,9,12</sup>. The elevated expression of  
163 ICRs on CD32+ CD4 T cells may partially explain the enrichment observed in  
164 previous studies with PD-1 and TIGIT. High level of CD2 expression was also  
165 previously identified as a maker of an enriched reservoir using an *in-vitro*  
166 model that also identified CD32 as a potential reservoir marker<sup>10</sup>. We  
167 observed an increased density of CD2 expression on CD32+ CD4 T cells,  
168 consistent with these results.

169 In our analysis of 19 individuals the percentage of CD32+ CD4 T cells did not  
170 predict time to pVL rebound following treatment interruption, although it is  
171 interesting that in Figure 1a the three individuals with post-treatment  
172 virological remission all had CD32 expression below the median. Delayed  
173 time to pVL rebound has been associated with lower HIV reservoir size<sup>20,22,23</sup>  
174 and is an outcome measure in HIV curative intervention trials. In a large sub-  
175 analysis of SPARTAC, HIV DNA levels, baseline pVL and CD4 count were  
176 predictive of time to viral rebound<sup>20</sup> but this was not seen in this smaller  
177 subset so we cannot rule out that our negative findings here are a  
178 consequence of being underpowered.

179

180 In the paper by Descours *et al.*, the addition of an integrase inhibitor into the  
181 *in-vitro* model reduced CD32 expression, suggesting that HIV integration  
182 resulted in CD32 upregulation<sup>12</sup>. Our finding of similar frequency and  
183 phenotype of CD32+ cells from HIV+ individuals and uninfected controls is  
184 therefore interesting. Although unstimulated CD4 T cells are not generally  
185 expected to express CD32<sup>11</sup>, we are not the first to observe low-level  
186 expression on CD4 T cells from healthy controls<sup>24</sup>. The similar level of CD32  
187 expression between the HIV-infected (treated and untreated) and uninfected  
188 groups studied here and the lack of correlation between CD32+ CD4 T cell  
189 frequency and reservoir size suggests that infection or integration events may  
190 not be the primary driver of inter-individual variation in CD32 expression level,  
191 which may also be impacted by genetic and other host factors. Whilst several  
192 polymorphisms in the FcγRII genes have been identified to have functional  
193 implications in HIV immunity<sup>25,26</sup>, whether these polymorphisms influence  
194 expression levels on CD4 T cells is unknown.

195 Several isoforms of CD32 exist, of which CD32a (FcγRIIa) and CD32b  
196 (FcγRIIb) are the most widely expressed. These two isoforms have an almost  
197 identical extracellular domain, but different intracellular signalling domains  
198 such that signalling in antigen presenting cells is activating through CD32b,  
199 but inhibitory through CD32a<sup>11,27</sup>. In the *in-vitro* model used to identify CD32  
200 as a marker of the reservoir, Descours *et al* note that FCGR2A - the gene  
201 encoding the CD32a isoform - was specifically upregulated, but not that of  
202 other isoforms<sup>12</sup>. The anti-CD32 antibody clone FUN-2 does not distinguish  
203 between different CD32 isoforms, and as this was used in the Descours

204 publication and our work, HIV enrichment cannot yet be associated with a  
205 particular CD32 isoform.

206 The HIV reservoir is considered to be comprised of resting CD4 T cells - the  
207 elevated expression of the activation marker HLA-DR on CD32+ cells  
208 observed here is therefore potentially surprising. Activated CD4 T cells are  
209 preferentially infected with HIV but rapidly die as a result of this process, and  
210 the HIV reservoir is thought to form from cells that are infected whilst activated  
211 and then transition to a resting state<sup>15,28,29</sup>. Taken together, the high levels of  
212 HLA-DR, ICR expression and advanced differentiation suggest that CD32+  
213 CD4 T cells have a history of activation - consistent with the current  
214 understanding of how the reservoir develops and is maintained.

215 The expression of CD32 on CD4 T cells remains controversial and a role for  
216 low-affinity Fc receptors on CD4 T cells has not been well established<sup>30-32</sup>.  
217 Although CD4 T cells are generally not considered to express CD32,  
218 expression may be induced by activation *in vitro*<sup>33,34</sup>. Expression of CD32b on  
219 memory CD8 T cells in murine infection models<sup>35</sup> is associated with reduced  
220 cytotoxicity and expansion, reversible on CD32b blockade<sup>35</sup>. This has  
221 interesting parallels with other co-inhibitory pathways, raising the possibility  
222 that CD32 isoforms may have a similar regulatory role on activated, antigen  
223 experienced CD4 T cells. This hypothesis may be linked to the enrichment of  
224 the HIV reservoir in CD32+ and ICR expressing CD4 T cells. Further work is  
225 needed to elucidate the specific mechanisms for enrichment of the HIV  
226 reservoir in these cells, but preferential infection or persistence of these cells  
227 is an alternative explanation that would be consistent with our findings.

228

229 In summary, we confirm that CD32+ CD4 T cells are enriched for HIV DNA  
230 and provide the first data showing similar enrichment in tissue. We show that  
231 CD32+ CD4 T cells have a more differentiated memory phenotype, and  
232 express high levels of PD-1, Tim-3 and TIGIT, as well as the activation marker  
233 HLA-DR. We show that the frequency and phenotype of CD32+ CD4 T cells is  
234 similar between uninfected and HIV-infected individuals - both prior to and  
235 following the initiation of ART. Even though possibly a marker for enrichment  
236 rather than a definitive biomarker of the reservoir, the identification of the role  
237 of CD32 raises the possibility of new diagnostic and therapeutic strategies  
238 within the HIV cure field.

239

## 240 **Methods**

### 241 *Participants*

242 Participants with PHI were recruited as part of the HEATHER (HIV Reservoir  
243 targeting with Early Antiretroviral Therapy) cohort. PHI was identified through  
244 one of the following criteria: (a) HIV-1 positive antibody test within 6 months of  
245 a HIV-1 negative antibody test, (b) HIV-1 antibody negative with positive PCR  
246 (or positive p24 Ag or viral load detectable), (c) RITA (recent incident assay  
247 test algorithm) assay result consistent with recent infection, (d) equivocal HIV-  
248 1 antibody test supported by a repeat test within 2 weeks showing a rising  
249 optical density and (e) having clinical manifestations of symptomatic HIV  
250 seroconversion illness supported by antigen positivity. For inclusion in the

251 cohort, participants with identified PHI commenced ART within 3 months of  
252 diagnosis, and did not have co-infection with Hepatitis B or C. Date of  
253 seroconversion was estimated as the midpoint of the dates of the most recent  
254 negative or equivocal test and positive test (criteria a and d above), the date  
255 of the test (b and e) or 120 days prior to the test date (c, the recency period of  
256 this assay). For our study, cryopreserved PBMCs were used from the closest  
257 pre-therapy sample to seroconversion (baseline) and from a sample 9-15  
258 months after commencement of ART (1 year). Terminal ileum and rectal  
259 samples were obtained from a subset of participants in HEATHER. Tonsil  
260 tissue was obtained through the Imperial College Communicable Disease  
261 Group Biobank from one HIV-infected individual with PHI undergoing routine  
262 tonsillectomy, 2 months after acquiring HIV. Terminal ileum and rectal  
263 samples from uninfected controls were obtained from individuals undergoing  
264 routine endoscopy from the Translational Gastroenterology Unit Oxford  
265 Tissue Biobank as part of the Oxford BRC-funded Oxford GI Illness Biobank  
266 Study.

267 Time to rebound analyses were conducted with a subset of participants from  
268 the SPARTAC (Short Pulse Antiretroviral Therapy at HIV Seroconversion) trial  
269 (EudraCT Number: 2004-000446-20). This was a multi-centre, randomised  
270 controlled trial of short course ART during PHI, the full design of which is  
271 described elsewhere<sup>19</sup>. The criteria used to define PHI in this trial are similar  
272 to above. In brief, this trial enrolled adults with PHI from 25 sites in Australia,  
273 Brazil, Ireland, Italy, South Africa, Spain, Uganda and the UK. Participants  
274 with PHI were randomised to receive either no immediate ART (standard of  
275 care), or 12 or 48 weeks of ART, after which they underwent a TI. The primary

276 trial endpoint was a composite of CD4 T cell count less than 350 cells/ $\mu$ L or  
277 the initiation of long term ART for any reason. Cryopreserved PBMCs were  
278 used from participants who received 48 weeks of ART and were virologically  
279 suppressed to <400 copies/mL at this time. Participants were included based  
280 on sample availability at the time of TI, and date of seroconversion was  
281 estimated as calculated previously<sup>7</sup>.

### 282 *Ethics statement*

283 Recruitment for and studies within the HEATHER cohort were approved by  
284 the West Midlands—South Birmingham Research Ethics Committee  
285 (reference 14/WM/1104).

286 The SPARTAC trial was approved by the following authorities: the Medicines  
287 and Healthcare products Regulatory Agency (UK), the Ministry of Health  
288 (Brazil), the Irish Medicines Board (Ireland), the Medicines Control Council  
289 (South Africa) and the Uganda National Council for Science and Technology  
290 (Uganda). It was also approved by the following ethics committees in the  
291 participating countries: the Central London Research Ethics Committee (UK),  
292 Hospital Universitário Clementino Fraga Filho Ethics in Research Committee  
293 (Brazil), the Clinical Research and Ethics Committee of Hospital Clinic in the  
294 province of Barcelona (Spain), the Adelaide and Meath Hospital Research  
295 Ethics Committee (Ireland), the University of Witwatersrand Human Research  
296 Ethics Committee, the University of Kwazulu-Natal Research Ethics  
297 Committee and the University of Cape Town Research Ethics Committee  
298 (South Africa), Uganda Virus Research Institute Science and ethics  
299 committee (Uganda), the Prince Charles Hospital Human Research Ethics

300 Committee and St Vincent's Hospital Human Research Ethics Committee  
301 (Australia) and the National Institute for Infectious Diseases Lazzaro  
302 Spallanzani, Institute Hospital and the Medical Research Ethics Committee,  
303 and the ethical committee of the Central Foundation of San Raffaele,  
304 MonteTabor (Italy).

305 All participants have given informed consent for their participation in these  
306 studies.

307  
308 *Processing of tissue samples*

309 Tonsillar tissue was dissected and mechanically digested, prior to  
310 cryopreservation of the cellular suspension.

311 Rectal and terminal ileum biopsies (up to 12 from each site) were collected at  
312 endoscopy and immediately place in RPMI-1640 media with 5% heat-  
313 inactivated fetal bovine serum (FBS), 0.04 mg/mL gentamicin, 100 IU/mL  
314 penicillin, 0.1 mg/mL streptomycin and 2mM L-glutamine. Biopsies were  
315 processed within 3 hours of sampling. Briefly, samples were washed in 1mM  
316 dithiothreitol (DTT) solution and then with PGA solution (Hanks' Balance Salt  
317 Solution with 0.04 mg/mL gentamicin, 100 IU/ml penicillin and 0.1 mg/mL  
318 streptomycin). Biopsy samples subsequently underwent collagenase and  
319 mechanical digestion using Collagenase D (1 mg/mL) for 30 minutes and a  
320 gentleMACS dissociator (Miltenyi Biotec), respectively. The resulting cell  
321 suspension was then strained using a 70 µM filter, washed with PGA and  
322 used for staining.

323 *Flow cytometry and cell sorting*

324 Cryopreserved PBMCs or tonsillar tissue were thawed in RPMI-1640 medium  
325 supplemented with 10% FBS, L-glutamine, penicillin and streptomycin as  
326 above (R10) containing 2.7 Kunitz units/mL of DNase (Qiagen). For analysis  
327 of memory phenotype and ICR expression, cells were stained in BD Horizon  
328 Brilliant Stain Buffer (BD) containing all antibodies and Live/Dead Near IR at 1  
329 in 300 dilution (Life Technologies) at 4°C for 30 minutes. PBMCs were stained  
330 with the following antibodies: CD32 PE-Cy7 (FUN-2), CD3 Brilliant Violet (BV)  
331 570 (UCHT1), CCR7 Pacific Blue (G043H7), CD27 AlexaFluor700 (M-5271),  
332 CD2 APC (RPA-2.10)[BioLegend], CD4 BV 605 (RPA-T4), CD8 BV 650  
333 (RPA-T8)[BD], PD-1 PE eFluor 610 (eBioJ105), CD45RA FITC (HI100), TIGIT  
334 PerCP-eFluor710 (MBSA43)[eBioscience] and Tim-3 PE (344823)[R&D].  
335 Isotype controls for CD32 were prepared using an irrelevant IgG2bk antibody  
336 (MPC-11)[BioLegend]. For time to rebound analyses, cells were stained as  
337 above in PBS with 5% FBS and 1mM EDTA containing Live/Dead Near IR,  
338 anti-CD32, anti-PD-1, anti-TIGIT as well as the following antibodies: CD3  
339 FITC (UCHT1)[BioLegend] and CD4 eFluor450 (OKT4)[eBioscience].  
340 Samples for HIV co-receptor stains were stained with LiveDead Near IR, anti-  
341 CD32 PE-Cy7, anti-CD3 FITC and anti-CD4 eFluor450 (as above). Following  
342 this, cells were incubated at 37°C for 20 minutes with anti-CCR5 PE  
343 (C57BL/6)[BD] or anti-CXCR4 APC (12G5)[BioLegend].

344 Mucosal cells were stained with LiveDead Near IR, anti-CD3 BV570, anti-CD4  
345 BV605, anti-CD8 BV650 and anti-TIGIT PE-eFluor710 as above. The  
346 following antibodies were also included: PD-1 PE-Cy7 (EH12.1), Tim-3 PE-  
347 CF594 (7D3), HLA-DR AlexaFluor700 (MAB)[BD] and CD32 PE (FUN-  
348 2)[BioLegend]. EPCAM APC-Vio770 (HEA-125) [Miltenyi Biotec] was also



349 used to allow for the exclusion of epithelial cells. Staining was performed for  
350 20 minutes at room temperature, followed by fixation and permeabilisation  
351 using the Human FoxP3 Buffer Set (BD Pharmingen) as per manufacturers  
352 protocol.

353 All samples were acquired on a LSR II (BD). The same machine was used for  
354 all experiments with daily calibration with Rainbow Calibration Particles  
355 (BioLegend) to maximise comparability between days. Data were analysed  
356 using FlowJo Version 10.8.0r1 (Treestar).

357 For sorting experiments, CD4 T cells were enriched from cells thawed as  
358 above by negative magnetic selection using EasySep Human CD4+ T cell  
359 Enrichment kit (StemCell Technologies). CD4 T cells were stained in R10 at  
360 4°C using Live/Dead Near IR, anti-CD32 PE-Cy7, anti-CD3 FITC, anti-CD4  
361 eFluor450. Sorting of CD32+ and CD32- CD4 T cells was performed using a  
362 Mo-Flo XDP.

### 363 *Measurement of HIV DNA*

364 For measurement of HIV DNA in bulk CD4 T cells, CD4 T cells were enriched  
365 from cryopreserved PBMCs as above or using Dynabeads Untouched Human  
366 CD4 T Cell Enrichment kit (Invitrogen). DNA was extracted from enriched  
367 CD4 T cells (QIAamp Blood Mini Kit; Qiagen) and sorted CD4 T cell subsets  
368 (QIAamp DNA Micro Kit, Qiagen or TRIzol extraction) and used as input for  
369 qPCR assays. Copies of HIV-1 DNA were quantified and normalised to  
370 number of input cells (as determined by albumin qPCR), by a previously  
371 described assay<sup>20,36</sup>. Where possible, PCRs were performed in triplicate

372 although due to the rare cell populations this was not possible for the sorted  
373 CD32+ cells.

#### 374 *Statistical analysis*

375 Continuous variables were compared between groups using non-parametric  
376 tests throughout. Comparisons between CD32+ and CD32- populations were  
377 performed using the Wilcoxon matched-pairs signed rank test. Where three  
378 groups were compared, a Kruskal-Wallis test (unpaired data) or Friedman test  
379 (paired data) was used; pairwise comparisons were performed on pre-  
380 determined combinations of groups only if the overall test p-value was <0.05.  
381 Correlative analyses were performed using Spearman's rank correlation. Time  
382 to viral rebound was assessed as time from treatment interruption to the first  
383 of two consecutive VL measurements >400 copies/mL (the limit of detection  
384 of the assay used at some trial sites). Individuals who did not rebound were  
385 censored at the date of the last VL measurement. Time to viral rebound was  
386 visualised with Kaplan-Meier curves stratified at the median and associations  
387 examined using Cox proportional hazard models. For all tests, p values <0.05  
388 were considered statistically significant. Analyses were performed using  
389 GraphPad Prism (GraphPad Software, La Jolla, California, USA) version 6.0f  
390 or R version 3.2.2.

391

## 392 References

- 393 1. Wherry, E.J. & Kurachi, M. Molecular and cellular insights into T cell  
394 exhaustion. *Nature reviews. Immunology* **15**, 486-499 (2015).
- 395 2. Trautmann, L., *et al.* Upregulation of PD-1 expression on HIV-specific  
396 CD8+ T cells leads to reversible immune dysfunction. *Nature medicine*  
397 **12**, 1198-1202 (2006).
- 398 3. Jones, R.B., *et al.* Tim-3 expression defines a novel population of  
399 dysfunctional T cells with highly elevated frequencies in progressive  
400 HIV-1 infection. *The Journal of experimental medicine* **205**, 2763-2779  
401 (2008).
- 402 4. Day, C.L., *et al.* PD-1 expression on HIV-specific T cells is associated  
403 with T-cell exhaustion and disease progression. *Nature* **443**, 350-354  
404 (2006).
- 405 5. Chew, G.M., *et al.* TIGIT Marks Exhausted T Cells, Correlates with  
406 Disease Progression, and Serves as a Target for Immune Restoration  
407 in HIV and SIV Infection. *PLoS pathogens* **12**, e1005349 (2016).
- 408 6. Hurst, J., *et al.* Immunological biomarkers predict HIV-1 viral rebound  
409 after treatment interruption. *Nature communications* **6**, 8495 (2015).
- 410 7. Hoffmann, M., *et al.* Exhaustion of Activated CD8 T Cells Predicts  
411 Disease Progression in Primary HIV-1 Infection. *PLoS pathogens* **12**,  
412 e1005661 (2016).
- 413 8. Fromentin, R., *et al.* CD4+ T Cells Expressing PD-1, TIGIT and LAG-3  
414 Contribute to HIV Persistence during ART. *PLoS pathogens* **12**,  
415 e1005761 (2016).
- 416 9. Chomont, N., *et al.* HIV reservoir size and persistence are driven by T  
417 cell survival and homeostatic proliferation. *Nature medicine* **15**, 893-  
418 900 (2009).
- 419 10. Iglesias-Ussel, M., Vandergeeten, C., Marchionni, L., Chomont, N. &  
420 Romerio, F. High levels of CD2 expression identify HIV-1 latently  
421 infected resting memory CD4+ T cells in virally suppressed subjects.  
422 *Journal of virology* **87**, 9148-9158 (2013).
- 423 11. Hogarth, P.M. & Pietersz, G.A. Fc receptor-targeted therapies for the  
424 treatment of inflammation, cancer and beyond. *Nature reviews. Drug*  
425 *discovery* **11**, 311-331 (2012).
- 426 12. Descours, B., *et al.* CD32a is a marker of a CD4 T-cell HIV reservoir  
427 harbouring replication-competent proviruses. *Nature* **543**, 564-567  
428 (2017).
- 429 13. Wong, J.K. & Yukl, S.A. Tissue reservoirs of HIV. *Current opinion in*  
430 *HIV and AIDS* **11**, 362-370 (2016).
- 431 14. Jaafoura, S., *et al.* Progressive contraction of the latent HIV reservoir  
432 around a core of less-differentiated CD4(+) memory T Cells. *Nature*  
433 *communications* **5**, 5407 (2014).
- 434 15. Chun, T.W., *et al.* Quantification of latent tissue reservoirs and total  
435 body viral load in HIV-1 infection. *Nature* **387**, 183-188 (1997).
- 436 16. Stohr W., *et al.* Duration of HIV-1 viral suppression on cessation of  
437 antiretroviral therapy in primary infection correlates with time on  
438 therapy. *Plos One* **8** (10) e78287 (2013).

- 439 17. Buzon, M.J., *et al.* Long-term antiretroviral treatment initiated at primary  
440 HIV-1 infection affects the size, composition, and decay kinetics of the  
441 reservoir of HIV-1-infected CD4 T cells. *Journal of virology* **88**, 10056-  
442 10065 (2014).
- 443 18. Saez-Cirion A., *et al.* Post-treatment HIV-1 controllers with a long-term  
444 virological remission after the interruption of early initiated antiretroviral  
445 therapy ANRS VISCONTI Study. *PLoS Pathog.* **9** (3), e1003211 (2013).
- 446 19. SPARTAC Trial Investigators, *et al.* Short-course antiretroviral therapy  
447 in primary HIV infection. *The New England journal of medicine* **368**,  
448 207-217 (2013).
- 449 20. Williams, J.P., *et al.* HIV-1 DNA predicts disease progression and post-  
450 treatment virological control. *eLife* **3**, e03821 (2014).
- 451 21. Olesen, R., *et al.* Immune checkpoints and the HIV-1 reservoir:  
452 proceed with caution. *Journal of virus eradication* **2**, 183-186 (2016).
- 453 22. Li, J.Z., *et al.* The size of the expressed HIV reservoir predicts timing of  
454 viral rebound after treatment interruption. *Aids* **30**, 343-353 (2016).
- 455 23. Assoumou, L., *et al.* A low HIV-DNA level in peripheral blood  
456 mononuclear cells at antiretroviral treatment interruption predicts a  
457 higher probability of maintaining viral control. *Aids* **29**, 2003-2007  
458 (2015).
- 459 24. Zandieh, A., *et al.* Cytometric profiling in various clinical forms of  
460 multiple sclerosis with respect to CD21+, CD32+, and CD35+ B and T  
461 cells. *Translational Neurodegeneration* **2**, 14 (2013).
- 462 25. Li, S.S., *et al.* FCGR2C polymorphisms associate with HIV-1 vaccine  
463 protection in RV144 trial. *The Journal of clinical investigation* **124**,  
464 3879-3890 (2014).
- 465 26. Forthal, D.N., *et al.* FcγRIIIa genotype predicts progression of  
466 HIV infection. *Journal of immunology* **179**, 7916-7923 (2007).
- 467 27. Woof, J.M. & Burton, D.R. Human antibody-Fc receptor interactions  
468 illuminated by crystal structures. *Nature reviews. Immunology* **4**, 89-99  
469 (2004).
- 470 28. Eisele, E. & Siliciano, R.F. Redefining the viral reservoirs that prevent  
471 HIV-1 eradication. *Immunity* **37**, 377-388 (2012).
- 472 29. Chun, T.W., *et al.* In vivo fate of HIV-1-infected T cells: quantitative  
473 analysis of the transition to stable latency. *Nature medicine* **1**, 1284-  
474 1290 (1995).
- 475 30. Sandor, M. & Lynch, R.G. Lymphocyte Fc receptors: the special case  
476 of T cells. *Immunology today* **14**, 227-231 (1993).
- 477 31. Nimmerjahn, F. & Ravetch, J.V. Fcγ receptors as regulators of  
478 immune responses. *Nature reviews. Immunology* **8**, 34-47 (2008).
- 479 32. Chauhan, A.K. Human CD4(+) T-Cells: A Role for Low-Affinity Fc  
480 Receptors. *Frontiers in immunology* **7**, 215 (2016).
- 481 33. Sandilands, G.P., *et al.* Differential expression of CD32 isoforms  
482 following alloactivation of human T cells. *Immunology* **91**, 204-211  
483 (1997).
- 484 34. Engelhardt, W., Matzke, J. & Schmidt, R.E. Activation-dependent  
485 expression of low affinity IgG receptors Fc γ RII(CD32) and Fc  
486 γ RIII(CD16) in subpopulations of human T lymphocytes.  
487 *Immunobiology* **192**, 297-320 (1995).

- 488 35. Starbeck-Miller, G.R., Badovinac, V.P., Barber, D.L. & Harty, J.T.  
489 Cutting edge: Expression of FcγRIIB tempers memory CD8 T  
490 cell function in vivo. *Journal of immunology* **192**, 35-39 (2014).  
491 36. Jones, M., *et al.* Low copy target detection by Droplet Digital PCR  
492 through application of a novel open access bioinformatic pipeline,  
493 'definetherain'. *Journal of virological methods* **202**, 46-53 (2014).  
494

495

496 **Acknowledgments**

497 We thank the participants of SPARTAC and HEATHER. The HEATHER study  
498 is conducted as part of the CHERUB (Collaborative HIV Eradication of  
499 Reservoirs: UK BRC) collaboration. (CHERUB Steering Committee: Andrew  
500 Lever (University of Cambridge), Mark Wills (University of Cambridge),  
501 Jonathan Weber (Imperial College, London), Sarah Fidler (Imperial College,  
502 London), John Frater (University of Oxford), Lucy Dorrell (University of  
503 Oxford), Mike Malim (King's College, London), Julie Fox (King's College  
504 London), Ravi Gupta (University College London), Clare Jolly (University  
505 College London).

506 The SPARTAC Trial Investigators: Trial Steering Committee: Independent  
507 Members- A Breckenridge (Chair), P Clayden, C Conlon, F Conradie, J  
508 Kaldor\*, F Maggiolo, F Ssali, Country Principal Investigators- DA Cooper, P  
509 Kaleebu, G Ramjee, M Schechter, G Tambussi, JM Miro, J Weber. Trial  
510 Physician: S Fidler. Trial Statistician: A Babiker. Data and Safety Monitoring  
511 Committee (DSMC): T Peto (Chair), A McLaren (in memoriam), V Beral, G  
512 Chene, J Hakim. Co-ordinating Trial Centre: Medical Research Council  
513 Clinical Trials Unit, London (A Babiker, K Porter, M Thomason, F Ewings, M  
514 Gabriel, D Johnson, K Thompson, A Cursley\*, K Donegan\*, E Fossey\*, P  
515 Kelleher\*, K Lee\*, B Murphy\*, D Nock\*). Central Immunology Laboratories  
516 and Repositories: The Peter Medawar Building for Pathogen Research,  
517 University of Oxford, UK (R Phillips, J Frater, L Ohm Laursen\*, N Robinson, P  
518 Goulder, H Brown). Central Virology Laboratories and Repositories: Jefferiss  
519 Trust Laboratories, Imperial College, London, UK (M McClure, D Bonsall\*, O

520 Erlwein\*, A Helander\*, S Kaye, M Robinson, L Cook\*, G Adcock\*, P Ahmed\*).

521 Clinical Endpoint Review Committee: N Paton, S Fidler. Investigators and

522 Staff at Participating Sites: Australia: St Vincents Hospital, Sydney (A

523 Kelleher), Northside Clinic, Melbourne (R Moore), East Sydney Doctors,

524 Sydney (R McFarlane), Prahran Market Clinic, Melbourne (N Roth), Taylor

525 Square Private Clinic, Sydney (R Finlayson), The Centre Clinic, Melbourne (B

526 Kiem Tee), Sexual Health Centre, Melbourne (T Read), AIDS Medical Unit,

527 Brisbane (M Kelly), Burwood Rd Practice, Sydney (N Doong), Holdsworth

528 House Medical Practice, Sydney (M Bloch), Aids Research Initiative, Sydney

529 (C Workman). Coordinating Centre in Australia: Kirby Institute University of

530 New South Wales, Sydney (P Grey, DA Cooper, A Kelleher, M Law). Brazil:

531 Projeto Praca Onze, Hospital Escola Sao Francisco de Assis, Universidade

532 federal do Rio de Janeiro, Rio de Janeiro (M Schechter, P Gama, M Mercon\*,

533 M Barbosa de Souza, C Beppu Yoshida, JR Grangeiro da Silva, A Sampaio

534 Amaral, D Fernandes de Aguiar, M de Fatima Melo, R Quaresma Garrido).

535 Italy: Ospedale San Raffaele, Milan (G Tambussi, S Nozza, M Pogliaghi, S

536 Chiappetta, L Della Torre, E Gasparotto), Ospedale Lazzaro Spallanzani,

537 Roma (G DOffizi, C Vlassi, A Corpolongo). South Africa: Cape Town:

538 Desmond Tutu HIV-1 Centre, Institute of Infectious Diseases, Cape Town (R

539 Wood, J Pitt, C Orrell, F Cilliers, R Croxford, K Middelkoop, LG Bekker, C

540 Heiberg, J Aploon, N Killa, E Fielder, T Buhler). Johannesburg: The Wits

541 Reproductive Health and HIV-1 Institute, University of Witswatersrand,

542 Hillbrow Health Precinct, Johannesburg (H Rees, F Venter, T Palanee),

543 Contract Laboratory Services, Johannesburg Hospital, Johannesburg (W

544 Stevens, C Ingram, M Majam, M Papathanasopoulos). Kwazulu-Natal: HIV-1

545 Prevention Unit, Medical Research Council, Durban (G Ramjee, S Gappoo, J  
546 Moodley, A Premrajh, L Zako). Uganda: Medical Research Council/Uganda  
547 Virus Research Institute, Entebbe (H Grosskurth, A Kamali, P Kaleebu, U  
548 Bahemuka, J Mugisha\*, HF Njaj\*). Spain: Hospital Clinic-IDIBAPS, University  
549 of Barcelona, Barcelona (JM Miro, M Lopez-Dieiguez\*, C Manzardo, J.  
550 Ambrosioni, D. Nicolas, JA Arnaiz, T Pumarola, M Plana, M Tuset, MC Ligeró,  
551 MT Garca, T Gallart, JM Gatell). UK and Ireland: Royal Sussex County  
552 Hospital, Brighton (M Fisher, K Hobbs, N Perry, D Pao, D Maitland, L Heald),  
553 St James's Hospital, Dublin (F Mulcahy, G Courtney, S O'Dea, D Reidy),  
554 Regional Infectious Diseases Unit, Western General Hospital and  
555 Genitourinary Dept, Royal Infirmary of Edinburgh, Edinburgh (C Leen, G  
556 Scott, L Ellis, S Morris, P Simmonds), Chelsea and Westminster Hospital,  
557 London (B Gazzard, D Hawkins, C Higgs), Homerton Hospital, London (J  
558 Anderson, S Mguni), Mortimer Market Centre, London (I Williams, N De  
559 Esteban, P Pellegrino, A Arenas-Pinto, D Cornforth\*, J Turner\*), North  
560 Middlesex Hospital (J Ainsworth, A Waters), Royal Free Hospital, London (M  
561 Johnson, S Kinloch, A Carroll, P Byrne, Z Cuthbertson), Barts & the London  
562 NHS Trust, London (C Orkin, J Hand, C De Souza), St Marys Hospital,  
563 London (J Weber, S Fidler, E Hamlyn, E Thomson\*, J Fox\*, K Legg, S  
564 Mullaney\*, A Winston, S Wilson, P Ambrose), Birmingham Heartlands  
565 Hospital, Birmingham (S Taylor, G Gilleran). Imperial College Trial  
566 Secretariat: S Keeling, A Becker. Imperial College DSMC Secretariat: C  
567 Boocock. (\* Left the study team before the trial ended.)

568 We thank Satish Keshav, Carolina Arancibia (Translational Gastroenterology  
569 Unit, Oxford University Hospitals NHS Trust, as part of the Oxford BRC-



570 funded Oxford GI Illness Biobank Study) and the participants who donated  
571 terminal ileum and rectal biopsies.

572

573 **Author contributions**

574 The experiments were conceived and designed by GM, MP, JT, CW, PKI, SF  
575 and JFr. Experiments were performed by GM, MP, JT, CP, MG, EH, HB, NR,  
576 NO and data analysed by GM, MP, JT, KP and JFr. Design and recruitment of  
577 the trials was performed by NN, JFo, SF, GR, PKa and JFr, with trial  
578 management performed by JM. The paper was written by GM and JFr with  
579 input from all authors.

580 **Tables**

581 **Table 1. Demographic and clinical characteristics of participants**

|                                                                         | <b>HEATHER (n=20)</b> | <b>SPARTAC (n=19)</b> |
|-------------------------------------------------------------------------|-----------------------|-----------------------|
| Sex                                                                     |                       |                       |
| • Male                                                                  | 20 (100%)             | 5 (26%)               |
| Age                                                                     | 33 (28 – 40.8)        | 27 (22 – 40)          |
| Country                                                                 |                       |                       |
| • United Kingdom                                                        | 20 (100%)             | 4 (21%)               |
| • South Africa/Uganda                                                   | 0                     | 13 (68%)              |
| • Other                                                                 | 0                     | 2 (11%)               |
| Time between estimated date of seroconversion and ART initiation (days) | 41.5 (22.5 – 55.3)    | 109 (76 – 124)        |
| Time of sampling (weeks since ART initiation)                           | 52.5 (52.0 – 57.6)    | 47.9 (47.6 – 48.0)    |
| Baseline CD4 T cell count (cells/ $\mu$ L)                              | 514 (376 – 628)       | 634 (535 – 764)       |
| Baseline HIV RNA ( $\log_{10}$ copies/mL)                               | 6.32 (4.55 – 6.76)    | 4.32 (3.68 – 4.95)    |

582

583 Demographic and clinical characteristics of participants included in main  
584 studies. Values given represent n (%) for categorical variables and median  
585 (interquartile range) for continuous variables.

586

587 **Figures**

588 **Figure 1. CD32 expression and HIV reservoir quantitation**

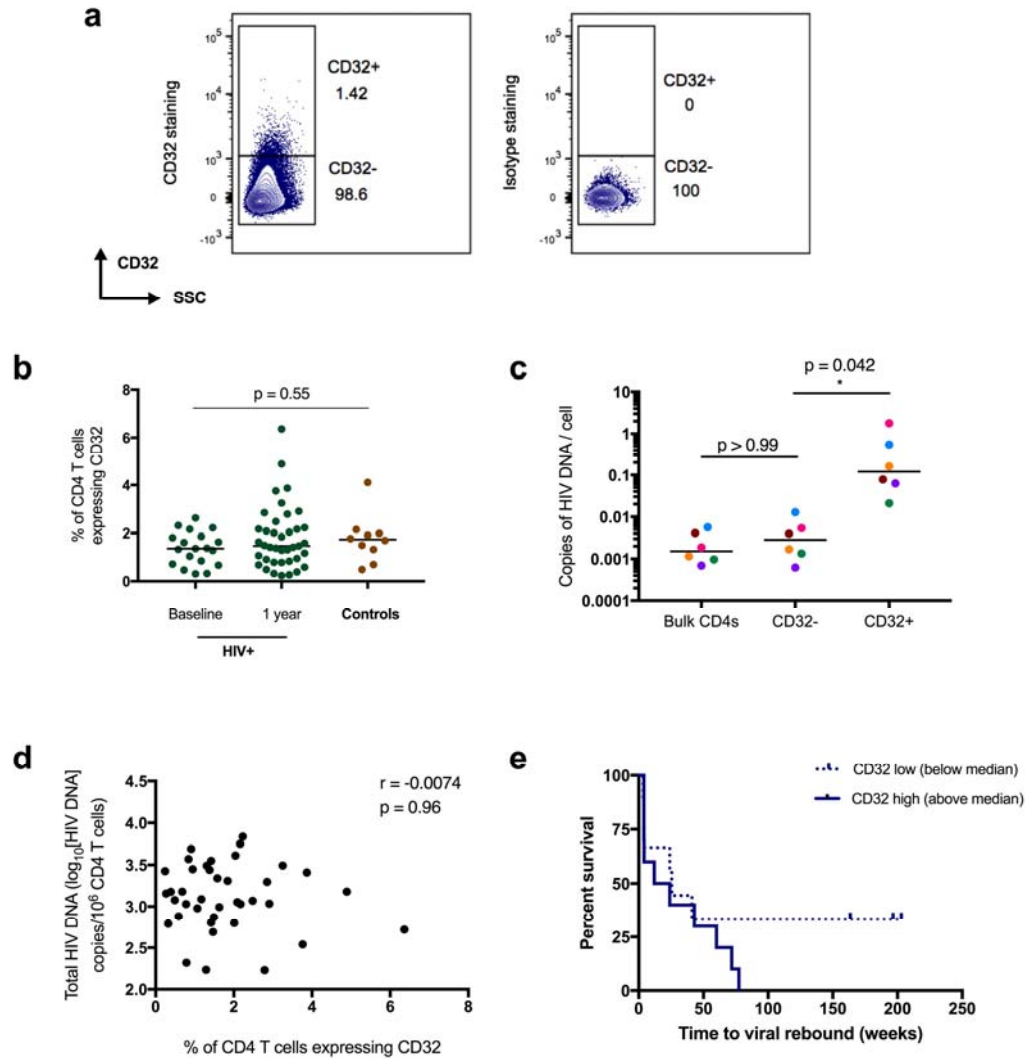

594 **Figure 1. CD32 expression and HIV reservoir quantitation**

595 Representative gating of CD32 on CD4 T cells from an HIV+ individual is  
596 shown (left panel) in (a), relative to isotype control (right panel). The  
597 percentage of CD32+ CD4 T cells is shown in (b) for HIV+ individuals with  
598 primary HIV infection pre-therapy (baseline; n=19) and 1 year following ART  
599 initiation (n=39), as well as for controls (n=10); groups were compared using a  
600 Kruskal-Wallis test. Panel (c) shows HIV DNA in bulk CD4s as well as sorted  
601 CD32+ and CD32- CD4 T cells from HIV+ individuals (n=6) at 1 year post-  
602 ART initiation. All three groups were compared using a Friedman test  
603 ( $p=0.0055$ ) with the p-values shown corresponding to subsequent pairwise  
604 comparisons with Dunn's multiple comparison test. For (b) and (c) bars  
605 indicate the median value. The relationship between HIV DNA and  
606 percentage of CD32+ CD4 T cells in treated HIV+ individuals (n=39), shown  
607 in (d), was assessed using Spearman's rank correlation. Panel (e) shows  
608 survival curves (Kaplan-Meier) of time to viral rebound >400 copies/mL based  
609 on CD32 expression (n=19) stratified at the median. All bars shown indicate  
610 the median value; \* indicates p-value <0.05.

611

612 **Figure 2. Memory differentiation of CD32+ and CD32- CD4 T cells**

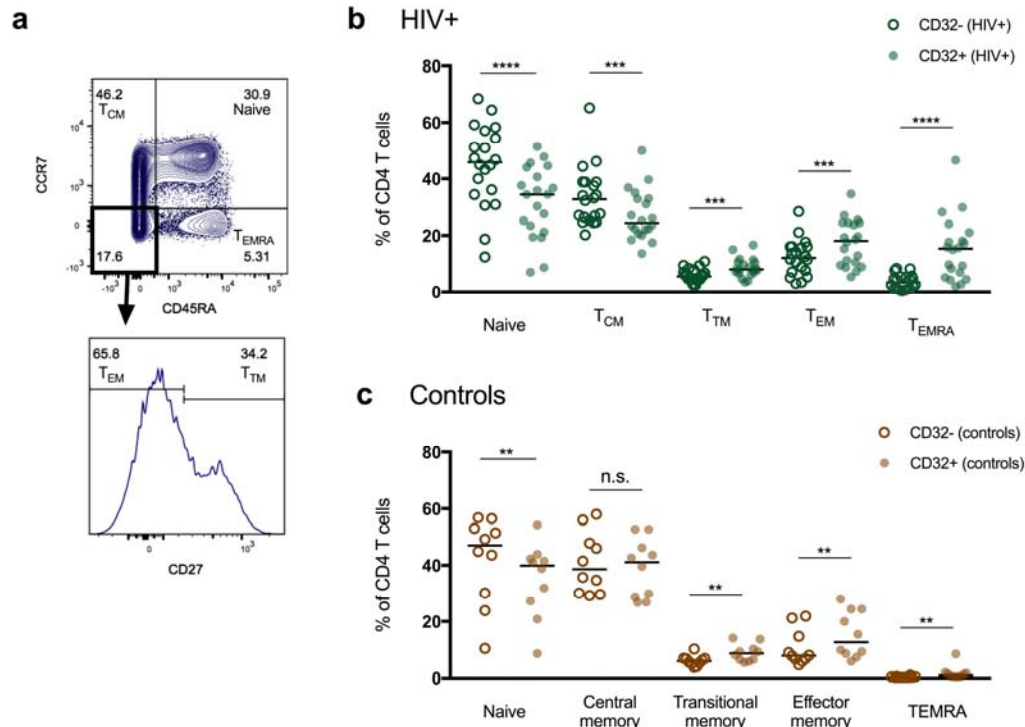

613

614 **Figure 2. Memory differentiation of CD32+ and CD32- CD4 T cells**

615 The percentage of CD32+ and CD32- CD4 T cells comprised of naïve, central  
616 memory (T<sub>CM</sub>), transitional memory (T<sub>TM</sub>), effector memory (T<sub>EM</sub>) and T<sub>EMRA</sub>  
617 cells was quantified by flow cytometry based on the expression of CD45RA,  
618 CCR7 and CD27. Representative gating is shown in (a). Panel (b) shows the  
619 difference in memory distribution between CD32+ (closed circles) and CD32-  
620 (open circles) CD4 T cells in HIV+ individuals (n=20) at 1 year following the  
621 initiation of antiretroviral therapy. CD32+ and CD32- subsets were compared  
622 using the Wilcoxon matched-pairs signed rank test. Bars indicate the median  
623 value. The same analysis is shown for healthy controls (n=10) in (c). \*\*\*\*  
624 indicates p<0.0001, \*\*\* indicates p 0.0001-0.001, \*\* indicates p 0.001-0.01,  
625 n.s. (non-significant) indicates p≥0.05.

626

627 **Figure 3. Immune checkpoint receptor, activation marker and CD2**  
628 **expression on peripheral blood CD32+ and CD32- CD4 T cells**

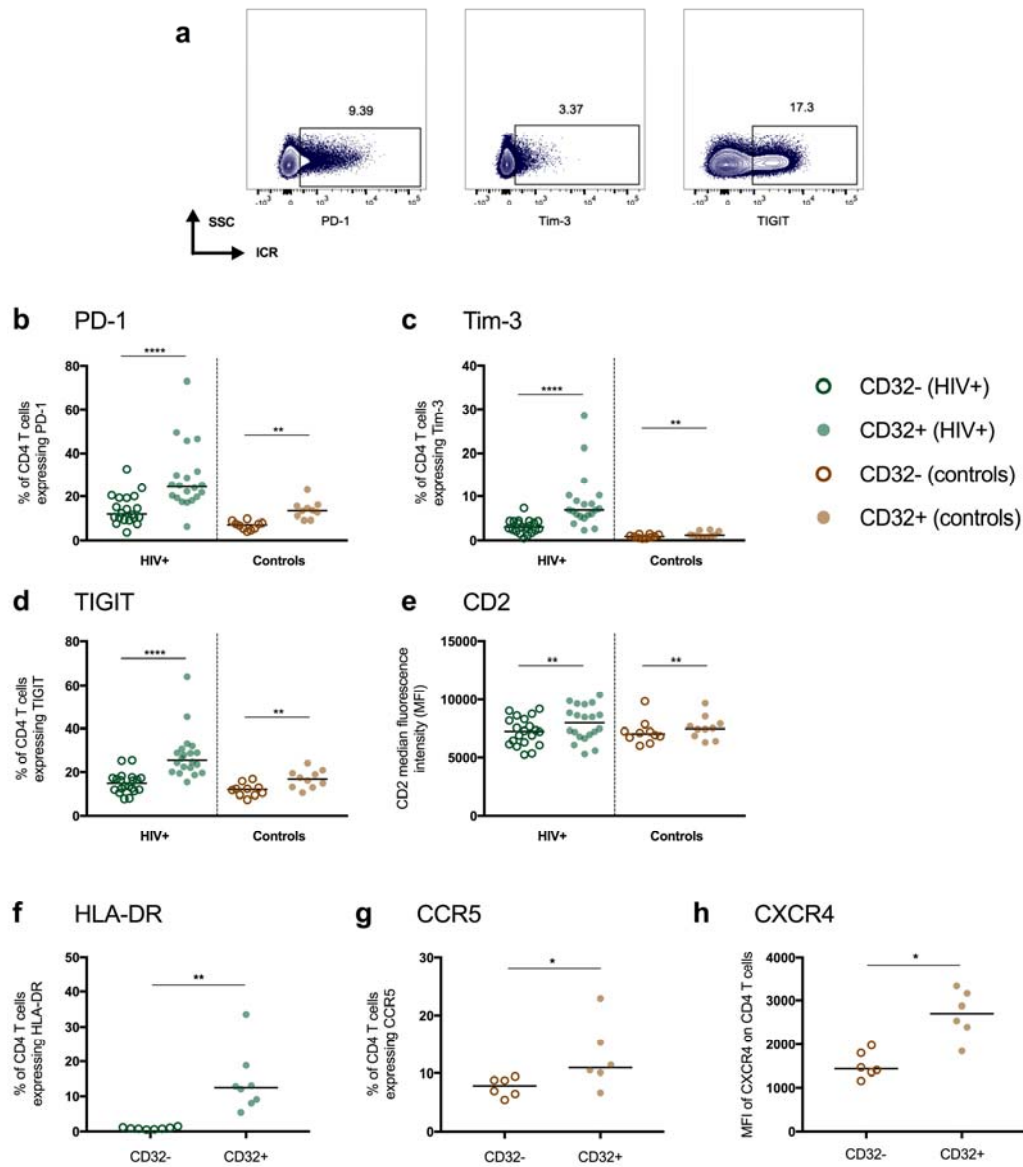

629

630 **Figure 3. Immune checkpoint receptor, activation marker and CD2**  
631 **expression on peripheral blood CD32+ and CD32- CD4 T cells**

632 The expression of PD-1, Tim-3 and TIGIT was measured on CD4 T cell  
633 subsets by flow cytometry, with representative gating shown in (a). The  
634 expression of PD-1 (b), Tim-3 (c), TIGIT (d) and CD2 (e) is shown on CD32+  
635 and CD32- CD4 T cells from HIV+ individuals (n=20) at 1 year following the

636 initiation of antiretroviral therapy and controls (n=10). In panels b-d the  
637 percentage of cells expressing each marker is shown; for e the median  
638 fluorescence intensity (MFI) is shown. (f) Expression of HLA-DR on CD32+  
639 and CD32- CD4 T cells from peripheral blood is shown from HIV+ individuals  
640 (n=8) at 1 year following the initiation of antiretroviral therapy. The expression  
641 of HIV co-receptors CCR5 (g) and CXCR4 (h) is shown between CD32+ and  
642 CD32- CD4 T cells from healthy controls. For CCR5 the percentage of cells  
643 expressing the marker is shown; for CXCR4 this is the MFI. Throughout,  
644 CD32+ cells (closed symbols) and CD32- cells (open symbols) were  
645 compared using the Wilcoxon matched-pairs signed rank test. Abbreviations  
646 used: ICR, immune checkpoint receptor; SSC, side-scattered light. \*\*\*\*  
647 indicates  $p < 0.0001$ , \*\* indicates  $p 0.001-0.01$ , \* indicates  $p 0.01-0.05$ .

648 **Figure 4. CD32 and immune checkpoint receptor expression in tissue**

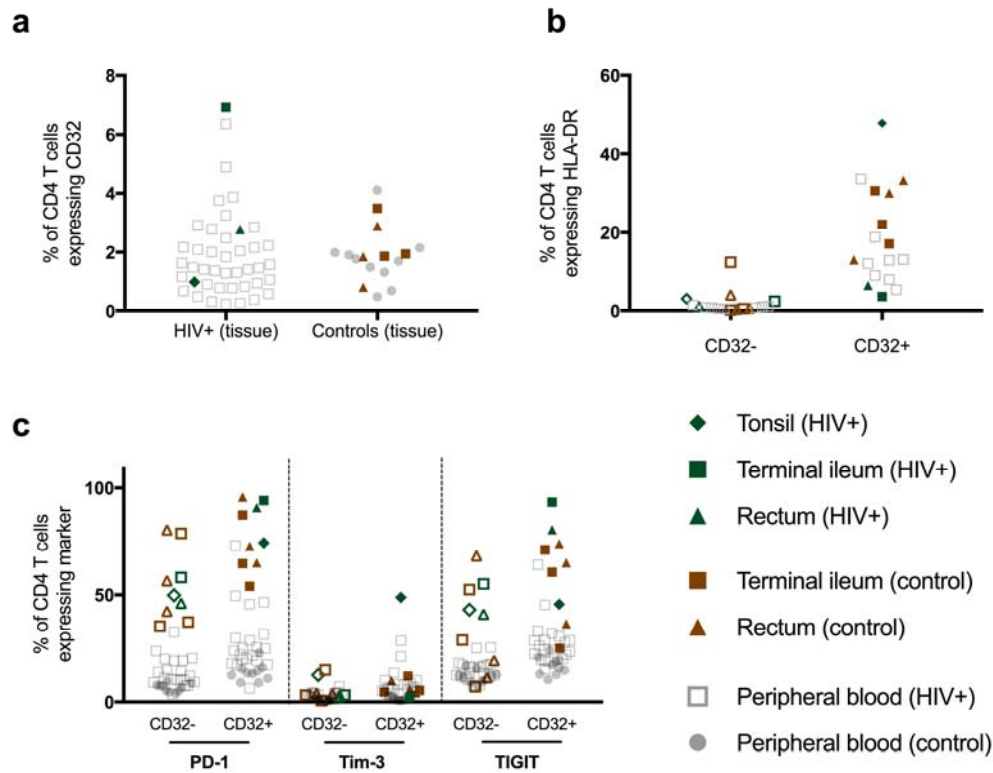

649

650 **Figure 4. CD32 and immune checkpoint receptor expression in tissue**

651 (a) The percentage of CD4 T cells expressing CD32 in tissue (HIV+ tonsil  
652 n=1, HIV+ gut n=1, HIV- gut n=3). (b) The expression of HLA-DR in tissue  
653 samples. (c) The expression of immune checkpoint receptors PD-1, Tim-3  
654 and TIGIT on CD32+ (shaded shapes) and CD32- (open shapes) CD4 T cell  
655 populations in these tissues for HIV+ and HIV- individuals. Throughout, values  
656 obtained in tissue are superimposed on those from the periphery (HIV+  
657 shown as open, grey squares and controls as shaded, grey circles) for visual  
658 comparison.

659
